# Supplementary material for: One-pot synthesis of hierarchical-pore metal–organic frameworks for drug delivery and fluorescent imaging
Source: Royal Society of Chemistry journal article supplement (doi:10.1039/c7ce02053h), 2018-01-01
Supplement: c7ce02053h1.pdf [file c7ce02053h1.pdf]

## Supporting Information

### One-pot Synthesis of Hierarchical-pore Metal–Organic Frameworks for Drug Delivery and Fluorescent Imaging

Xuechuan Gao,<sup>‡a</sup> Yuewu Wang,<sup>‡b</sup> Guanfeng Ji,<sup>a</sup> Ruixue Cui<sup>a</sup> and Zhiliang Liu<sup>\*a</sup>

<sup>a</sup> College of Chemistry and Chemical Engineering, Inner Mongolia University, Hohhot, 010021, P.

R. China. E-mail: cezliu@imu.edu.cn

<sup>b</sup> The center for new drug safety evaluation and research, Inner Mongolia Medical University,

Hohhot, 010021, P. R. China.

#### Supplementary Information:

##### Experimental section

**Figure S1. Chemical structures of RhB (A), 5-FU (B) and TCH (C)**

**Figure S2. SEM images of Al-MOF (A), RhB@Al-MOF-1 (B), RhB@Al-MOF-2 (C) and RhB@Al-MOF (D)**

**Figure S3. The pore size distributions of Al-MOF (A) and RhB@Al-MOF (B)**

**Figure S4. FTIR spectra of RhB (A), RhB@Al-MOF (B), Al-MOF (C)**

**Figure S5. The TGA curves of Al-MOF (A) and RhB@Al-MOF (B)**

**Figure S6. The excitation spectra of Al-MOF (A) and RhB@Al-MOF (B) in the solid state**

**Figure S7. The emission spectra of RhB@Al-MOF (A) and RhB (B) in the solid state**

**Figure S8. The solid-state UV–vis spectra of Al-MOF (A), RhB@Al-MOF (B) and RhB (C)**

**Figure S9. FTIR spectra of RhB@Al-MOF (A), RhB@Al-MOF/5-FU/TCH (B), TCH (C), 5-FU (D)**

**Figure S10. XRD patterns of as-synthesized RhB@Al-MOF (A) and RhB@Al-MOF/5-FU/TCH (B)**

**Figure S11. The calibration curves of 5-FU (a) and TCH (b)**

**Figure S12. XRD patterns of RhB@Al-MOF/5-FU/TCH after drug release (A) and RhB@Al-MOF/5-FU/TCH (B)**

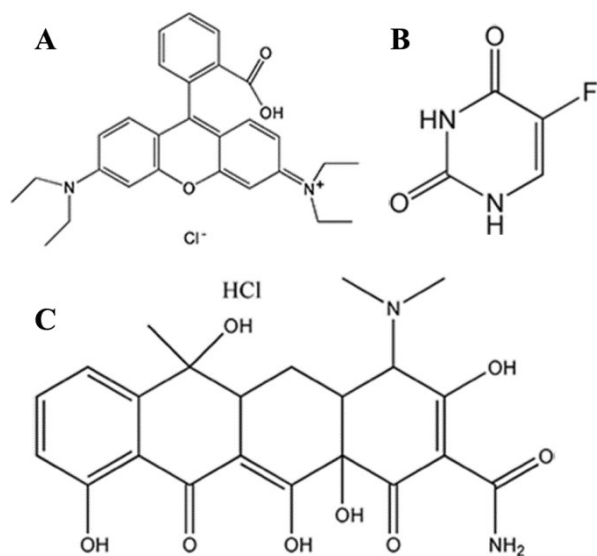

**Figure S1.** Chemical structures of RhB (A), 5-FU (B) and TCH (C)

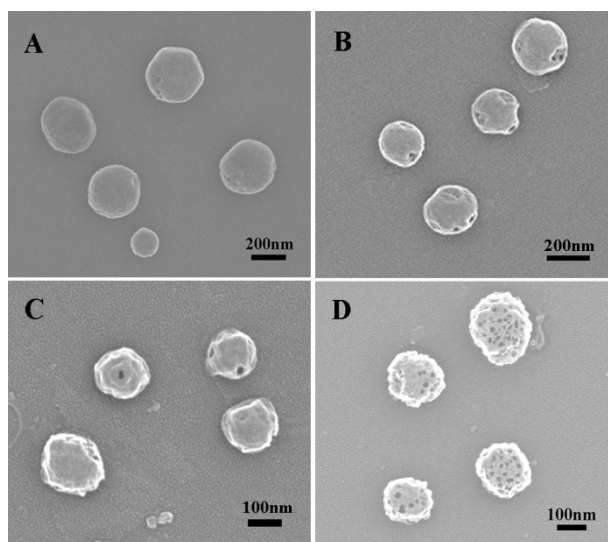

**Figure S2.** SEM images of Al-MOF (A), RhB@Al-MOF-1 (B), RhB@Al-MOF-2 (C) and

RhB@Al-MOF (D)

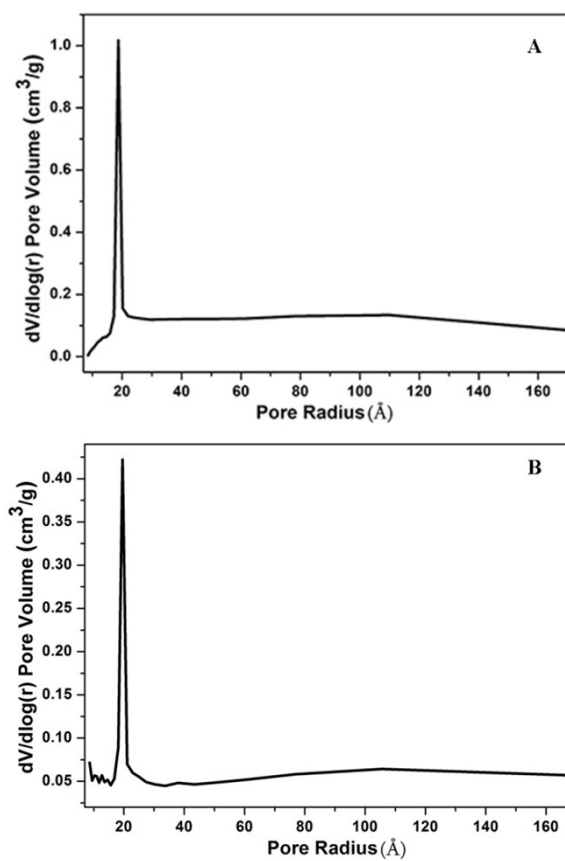

**Figure S3.** The pore size distributions of Al-MOF (A) and RhB@Al-MOF (B)

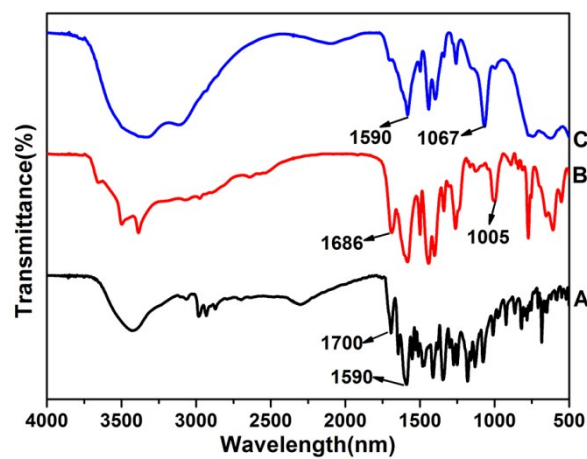

**Figure S4.** FTIR spectra of RhB (A), RhB@Al-MOF (B), Al-MOF (C)

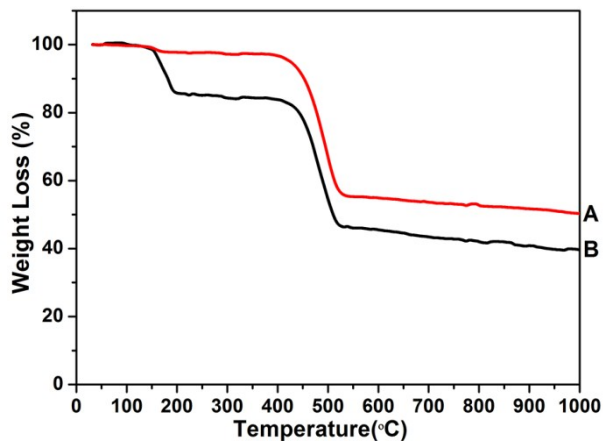

**Figure S5.** The TGA curves of Al-MOF (A) and RhB@Al-MOF (B)

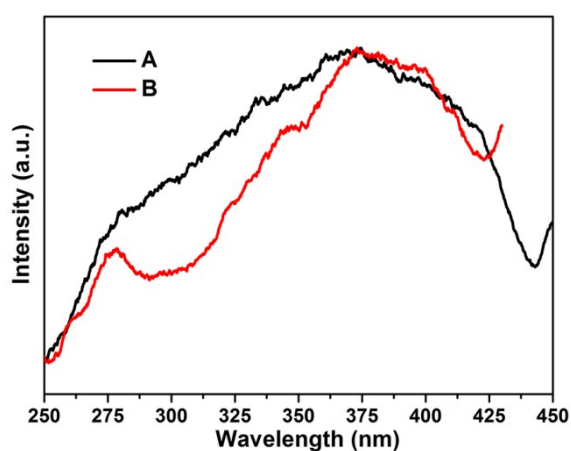

**Figure S6.** The excitation spectra of Al-MOF (A) and RhB@Al-MOF (B) in the solid state

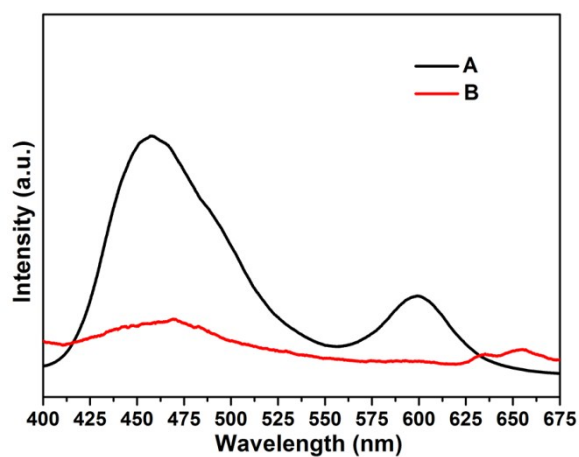

**Figure S7.** The emission spectra of RhB@Al-MOF (A) and RhB (B) in the solid state

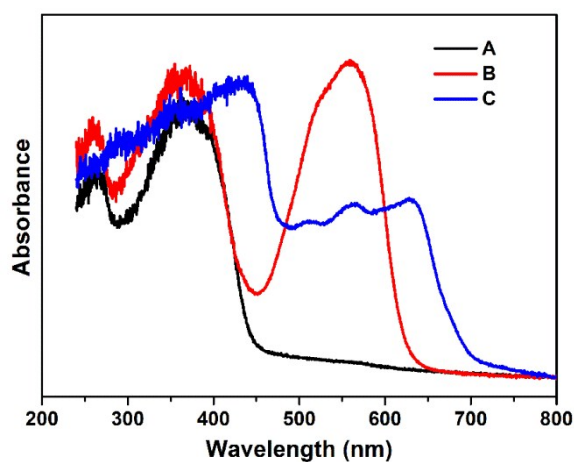

**Figure S8.** The solid-state UV-vis spectra of Al-MOF (A), RhB@Al-MOF (B) and RhB (C)

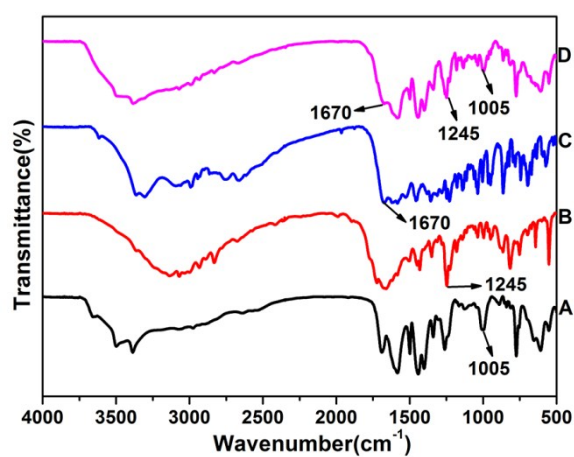

**Figure S9.** FTIR spectra of RhB@Al-MOF (A), 5-FU (B), TCH (C) and RhB@Al-MOF/5-FU/TCH (D)

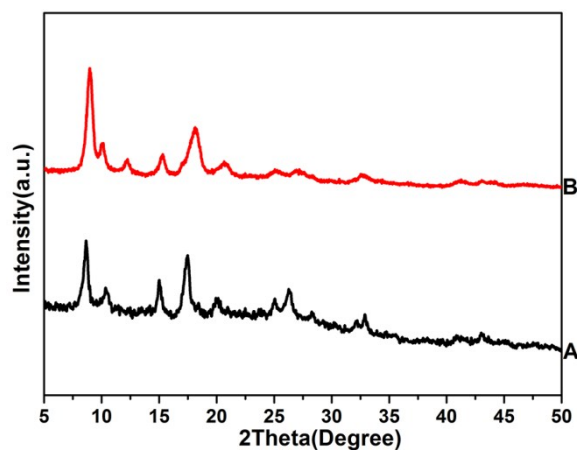

**Figure S10.** XRD patterns of as-synthesized RhB@Al-MOF (A) and RhB@Al-MOF/5-FU/TCH

(B)

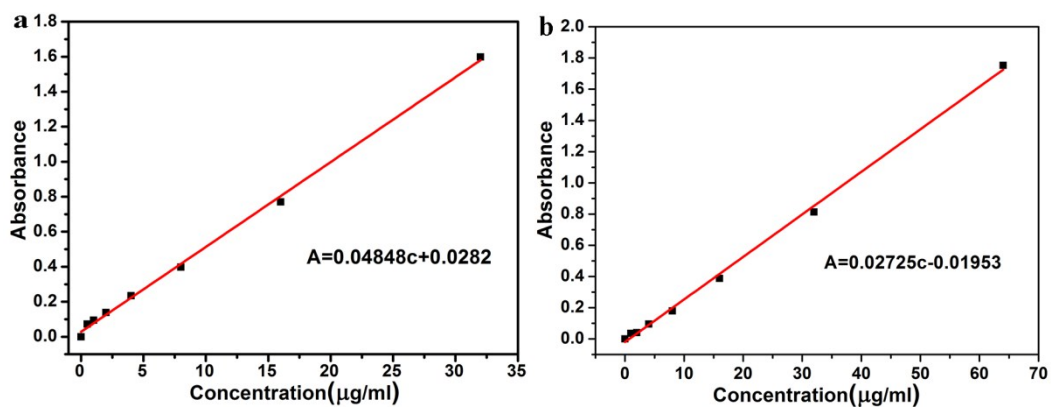

**Figure S11.** The calibration curves of 5-FU (a) and TCH (b)

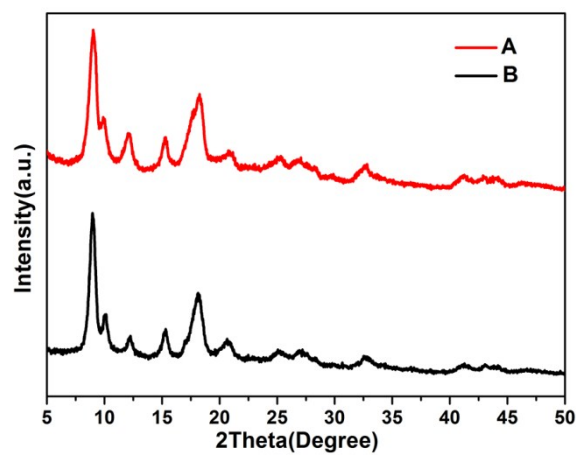

**Figure S12.** XRD patterns of RhB@Al-MOF/5-FU/TCH after drug release (A) and RhB@Al-MOF/5-FU/TCH (B)
